# Supplementary material for: Spatiotemporal dynamics exhibited by horizontal basal cells reveal a pro-neurogenic pathway during injury-induced olfactory epithelium regeneration
Source: PubMed Central journal article supplement — iScience. 2024 Mar 27;27(5):109600. doi: 10.1016/j.isci.2024.109600 (PMC11033173; doi:10.1016/j.isci.2024.109600), 2024-03-27
Supplement: mmc1.pdf [file mmc1.pdf]

iScience, Volume 27

## **Supplemental information**

### **Spatiotemporal dynamics exhibited by horizontal basal cells reveal a pro-neurogenic pathway during injury-induced olfactory epithelium regeneration**

**Jonathan D. Louie, Camila M. Barrios-Camacho, Benjamin H. Bromberg, Constantin A. Hintschich, and James E. Schwob**

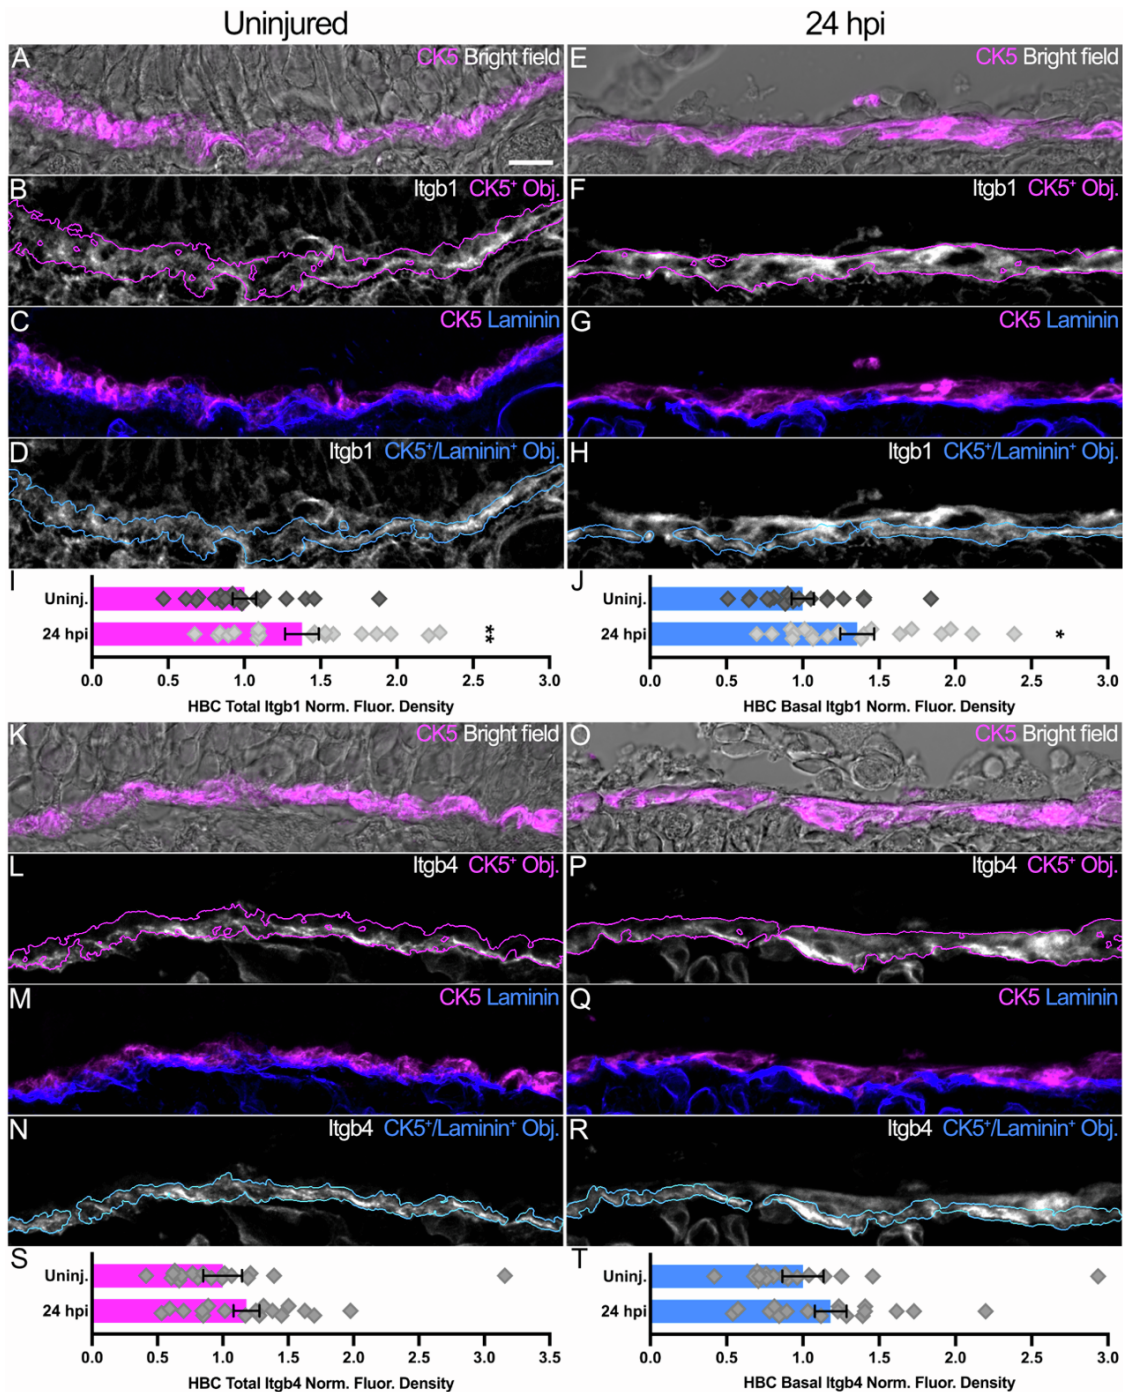

**Figure S1: Despite p63 downregulation, HBCs at 24 hpi do not downregulate Itgb1 and Itgb4 (related to Figure 1).** A-J: Identical regions illustrated in Figure 1F (A) and 1J (E) delineating total HBC area (magenta outlines in B and F). Identical regions illustrated in Figure 1G (C) and 1K (G) delineating HBC basal domains (blue outlines in D and H). Relative to HBCs within uninjured (uninj.) OE, HBCs at 24 hpi upregulate both total (I) and basal Itgb1 (J) ( $n = 3$  mice across 19 regions). K-T: Identical regions illustrated in Figure 1O (K) and Figure 1S (O) delineating total HBC area (magenta outlines in L and P). Identical regions illustrated in Figure 1P (M) and 1T (Q) delineating HBC basal domains (blue outlines in N and R). Relative to HBCs within uninj. OE, HBCs at 24 hpi do not significantly alter their expression of both total (S) and basal Itgb4 (T) ( $n = 3$  mice across 17 regions). Unpaired t-test (I, J), Mann-Whitney test (S, T). Uninj. used as baseline, error bars indicate mean  $\pm$  SEM, \* $p < 0.05$ , \*\* $p < 0.01$  (I, J, S, T). Scale bar equals 10  $\mu$ m (A).

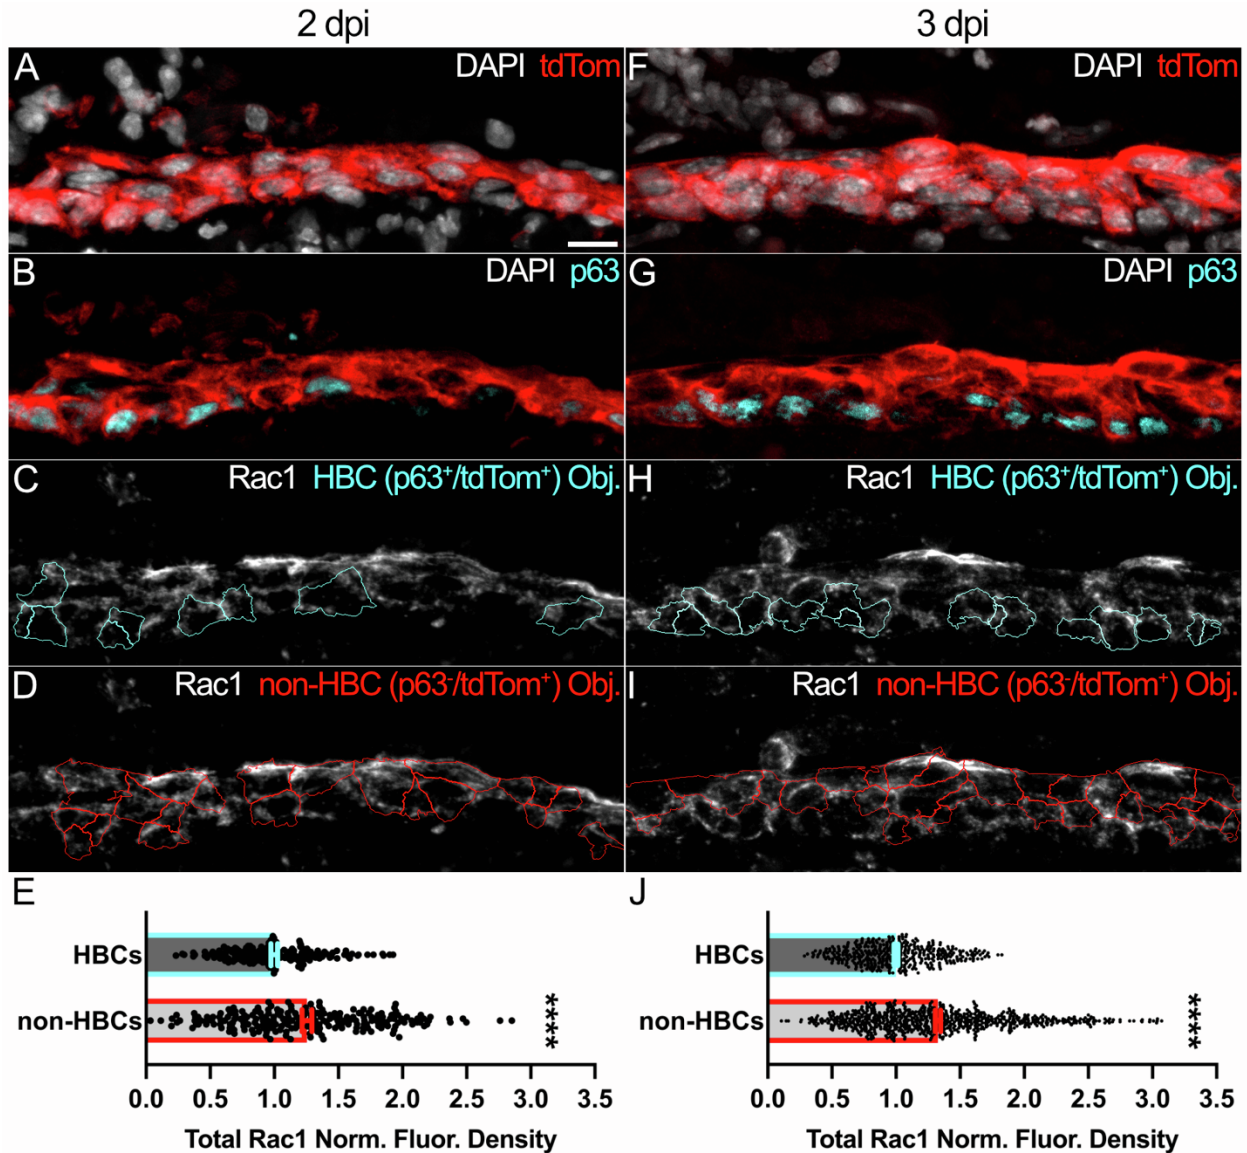

**Figure S2: As OE regeneration proceeds, HBCs progressively diminish Rac1 expression relative to emerging non-HBCs (related to Figure 2).** A-D:  $p63^+/tdTom^+$  HBCs (cyan outlines in C) within the regenerating OE at 2 dpi (A, B) decrease Rac1 expression relative to  $p63^+/tdTom^+$  non-HBCs (red outlines in D). E: Quantification of total Rac1 norm. fluor. density within  $p63^+/tdTom^+$  HBCs and  $p63^+/tdTom^+$  non-HBCs at 2 dpi, each point represents an analyzed obj. (as represented by cyan and red outlines, respectively, in C and D) ( $n = 3$  mice, 176  $p63^+/tdTom^+$  HBCs and 218  $p63^+/tdTom^+$  non-HBCs). F-I:  $p63^+/tdTom^+$  HBCs (cyan outlines in H) within the regenerating OE at 3 dpi (F, G) are at a further deficit in Rac1 expression relative to  $p63^+/tdTom^+$  non-HBCs (red outlines in I). J: Quantification of total Rac1 norm. fluor. density within  $p63^+/tdTom^+$  HBCs and  $p63^+/tdTom^+$  non-HBCs at 3 dpi, each point represents an analyzed obj. (as represented by cyan and red outlines, respectively, in H and I) ( $n = 3$  mice, 412  $p63^+/tdTom^+$  HBCs and 796  $p63^+/tdTom^+$  non-HBCs). Mann-Whitney test,  $p63^+/tdTom^+$  HBCs used as baseline, error bars indicate mean  $\pm$  SEM, \*\*\*\* $p < 0.0001$  (E, J). Scale bar equals 10  $\mu$ m (A).

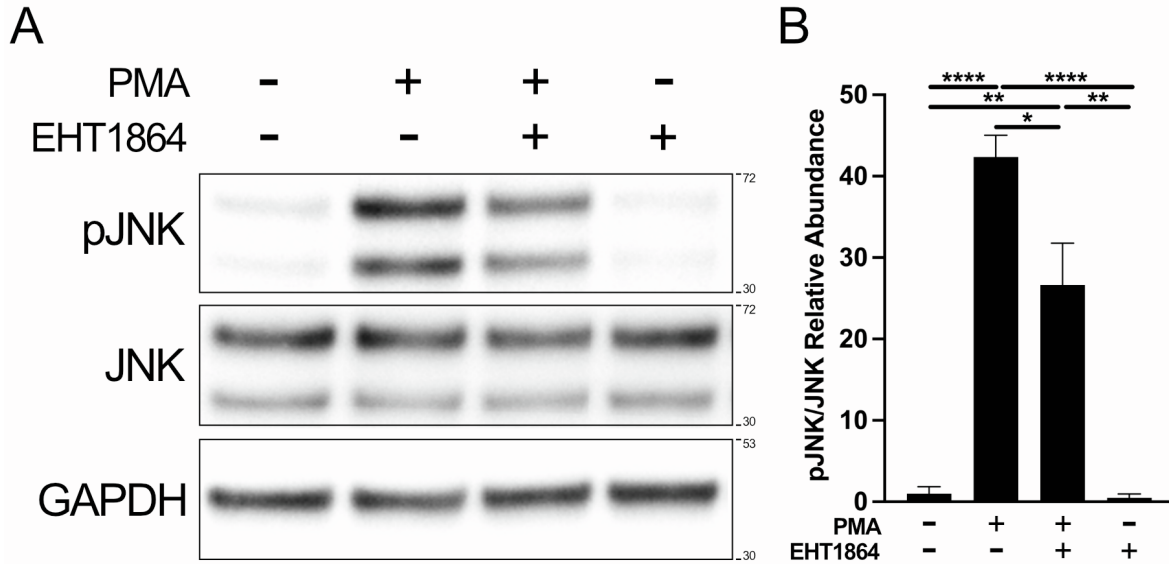

**Figure S3: Primary HBCs activated *in vitro* enhance multiple components of Rac1-mediated signaling (related to Figure 3).** A: Representative western blots depicting pJNK, total JNK, and GAPDH abundances in cultures of vehicle-treated (PMA-/EHT1864-), activated (PMA+/EHT1864-), activated and Rac1 inhibited (PMA+/EHT1864+), and Rac1 inhibited (PMA-/EHT1864+) HBCs. B: Quantification of densitometric measurements for normalized pJNK per normalized total JNK abundance (n = 3 independent trials), vehicle-treated used as baseline, error bars indicate mean + SEM, one-way ANOVA with post-hoc Tukey's multiple comparisons test, \* $p < 0.05$ , \*\* $p < 0.01$ , \*\*\*\* $p < 0.0001$ .

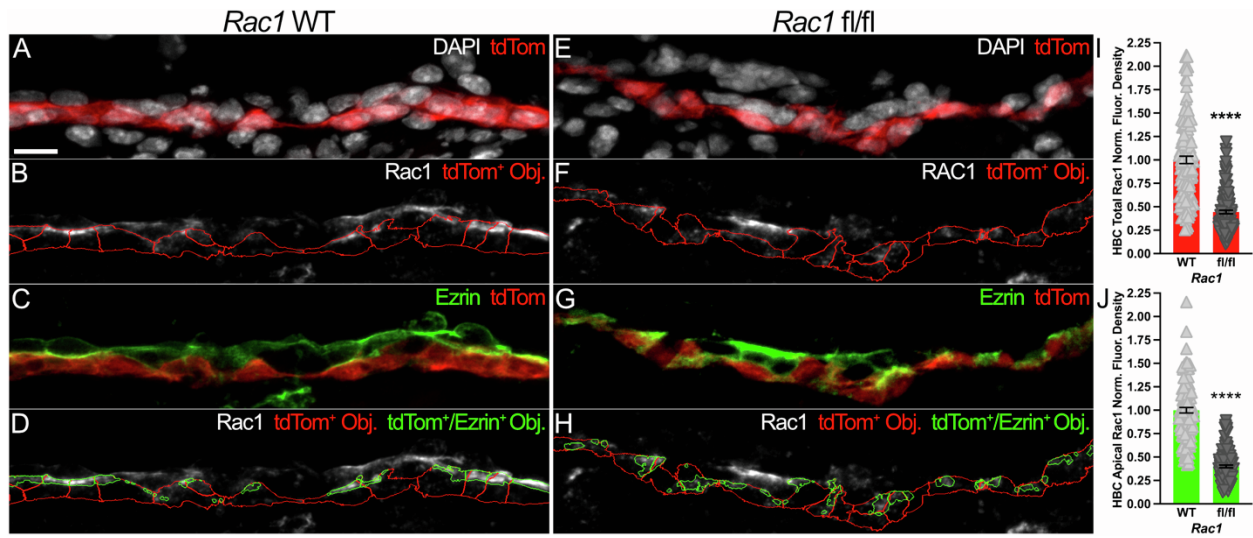

**Figure S4: Decreased HBC-expressed total and apical Rac1 in *Rac1* fl/fl mice at 24 hpi (related to Figure 5).** A-H: Representative immunofluorescence images demonstrating significantly decreased total (red outlines in B and F) and apical (green outlines in D and H) Rac1 expression within HBCs of *Rac1* fl/fl OE (E-H) relative to those found within *Rac1* WT OE (A-D). I: Quantification of total Rac1 norm. fluor. density within tdTom<sup>+</sup> HBCs, each triangle denotes an analyzed tdTom<sup>+</sup> Obj. as represented in B and F (n = 3 mice, 126 *Rac1* WT HBCs and 131 *Rac1* fl/fl HBCs). J: Quantification of Rac1 norm. fluor. density within tdTom<sup>+</sup> HBC apical domains, each triangle denotes an analyzed tdTom<sup>+</sup>/Ezrin<sup>+</sup> Obj. as represented in D and H (n = 3 mice, 117 *Rac1* WT HBCs and 122 *Rac1* fl/fl HBCs). *Rac1* WT used as baseline, error bars indicate mean  $\pm$  SEM, Mann-Whitney test, \*\*\*\*p<0.0001 (I, J). Scale bar equals 10  $\mu$ m (A).

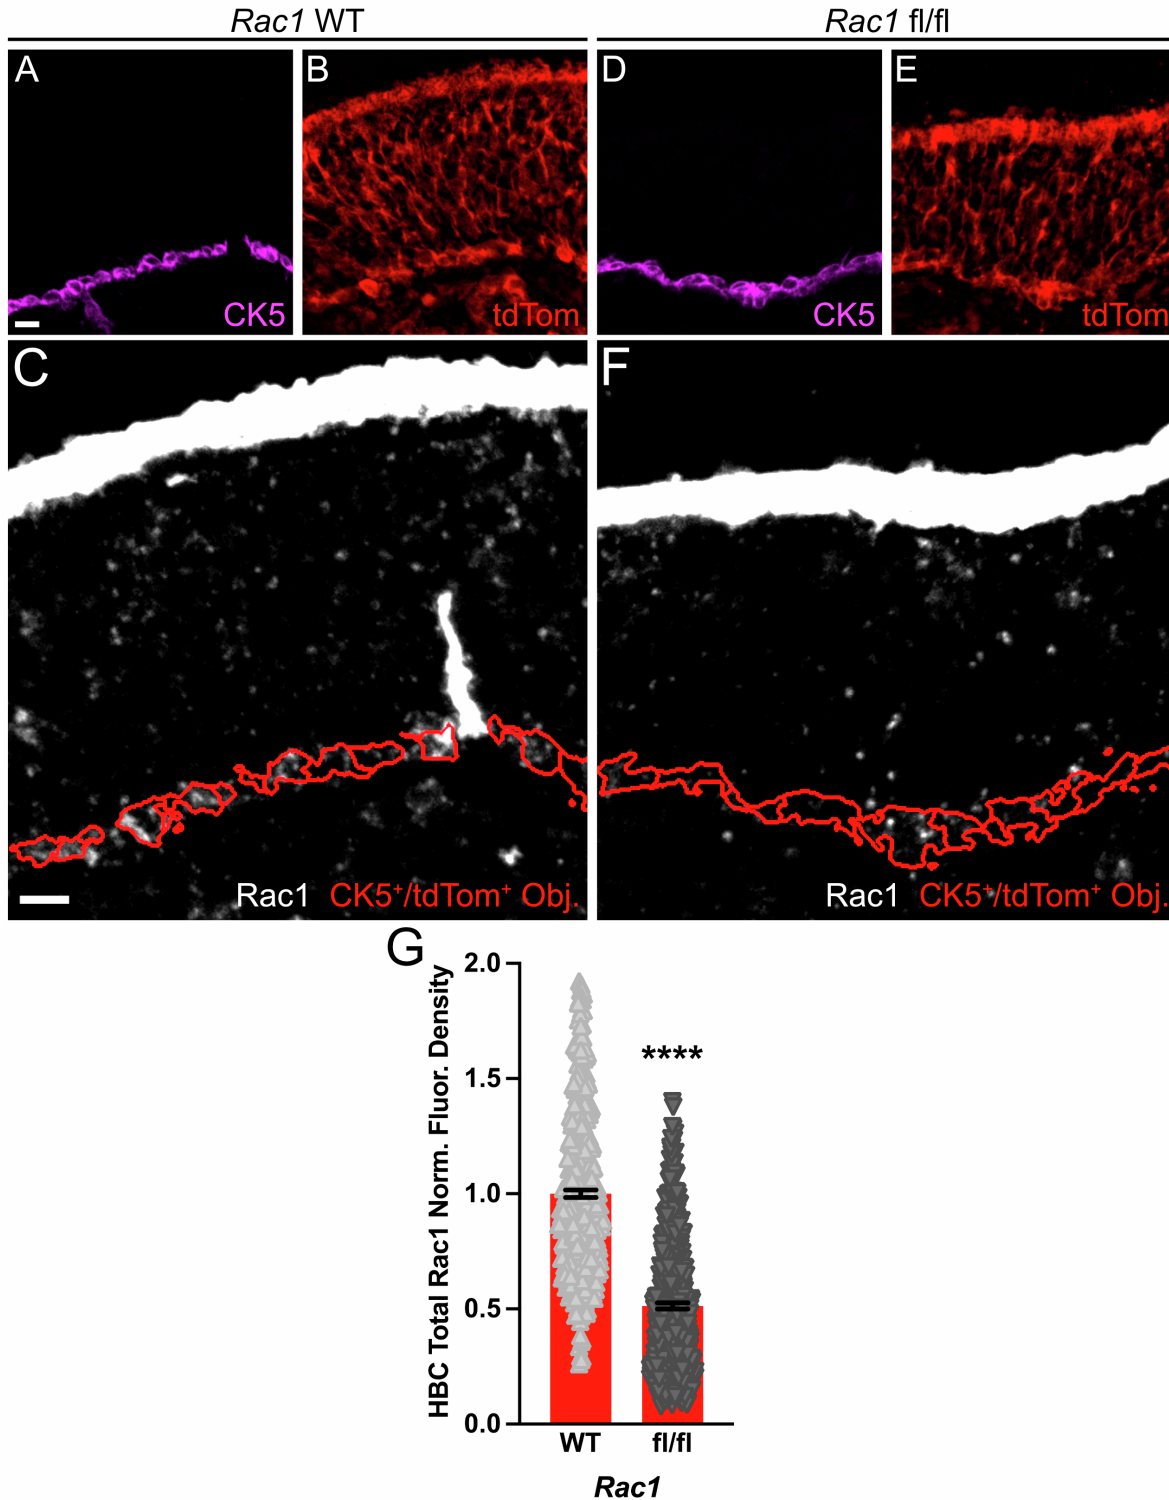

**Figure S5: Decreased HBC-expressed Rac1 in *Rac1* fl/fl mice at 28 dpi (related to Figure 6).** A-F: Immunofluorescence of Rac1 localized to CK5<sup>+</sup>/tdTom<sup>+</sup> HBCs (within red outlines, C and F) at 28 dpi demonstrates persistent and decreased Rac1 expression in *Rac1* WT (A-C) and *Rac1* fl/fl (D-F) mice, respectively. G: Quantification of total Rac1 norm. fluor. density within CK5<sup>+</sup>/tdTom<sup>+</sup> HBCs, each triangle denotes an analyzed CK5<sup>+</sup>/tdTom<sup>+</sup> Obj. as represented in C and F (n = 3 mice, 436 *Rac1* WT HBCs and 477 *Rac1* fl/fl HBCs). *Rac1* WT used as baseline, error bars indicate mean ± SEM, Mann-Whitney test, \*\*\*\*p<0.0001 (G). Scale bar equals 10 μm (A, C).

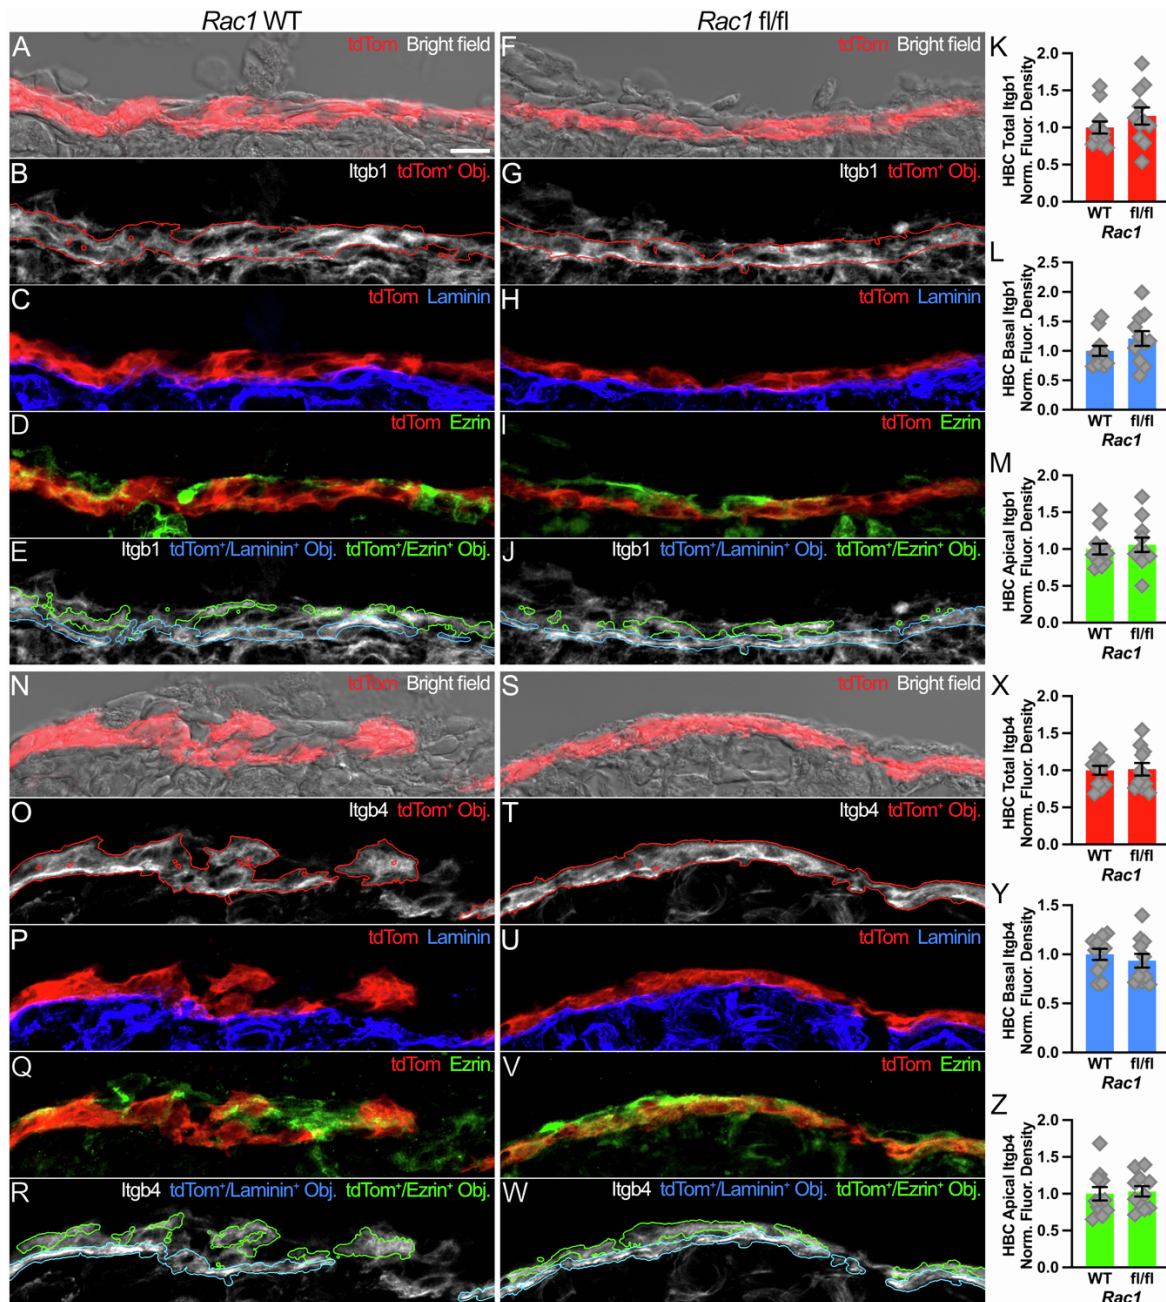

**Figure S6: Itgb1 and Itgb4 expression within intracellular domains of tdTom<sup>+</sup> HBCs at 24 hpi is unaffected by HBC-specific *Rac1* cKO (related to Figure 5).** A-J: Representative immunofluorescence images of tdTom<sup>+</sup> HBCs at 24 hpi (A, C, D, F, H, I) demonstrating that total (within red outlines, B and G), basal (within blue outlines, E and J), and apical (within green outlines, E and J) expression of Itgb1 is not significantly different between *Rac1* WT (A-E) and *Rac1* fl/fl (F-J) OE. K-M: Quantification of total (K), basal (L), and apical (M) Itgb1 norm. fluor. density within tdTom<sup>+</sup> HBCs, each diamond denotes an analyzed region as represented in B and G (K) and E and J (L and M) (n = 11 regions across 3 mice). N-W: Representative immunofluorescence images of tdTom<sup>+</sup> HBCs at 24 hpi (N, P, Q, S, U, V) demonstrating that total (within red outlines, O and T), basal (within blue outlines, R and W), and apical (within green outlines, R and W) expression of Itgb4 is not significantly different between *Rac1* WT (N-R) and *Rac1* fl/fl (S-W) OE. X-Z: Quantification of total (X), basal (Y), and apical (Z) Itgb4 norm. fluor. density within tdTom<sup>+</sup> HBCs, each diamond denotes an analyzed region as represented in O and T (X) and R and W (Y and Z) (n = 11 regions across 3 mice). Mann-Whitney test (K, L), unpaired t-test (M, X-Z). *Rac1* WT used as baseline, error bars indicate mean  $\pm$  SEM. Scale bar equals 10  $\mu$ m (A).

**Table S1: Antibodies used for immunofluorescent labeling and their associated conditions (related to STAR Methods).**

| Antibody                  | Source                               | Identifier     | Dilution | Antigen Retrieval Required | Signal Detection      |
|---------------------------|--------------------------------------|----------------|----------|----------------------------|-----------------------|
| Mouse $\alpha$ -p63       | ATCC                                 | Clone 4A4      | 1:100    | Yes                        | Secondary fluorophore |
| Mouse $\alpha$ -Ezrin     | Developmental Studies Hybridoma Bank | CPTC-Ezrin-1   | 1:25     | No                         | SA-fluorophore        |
| Rabbit $\alpha$ -Laminin  | Novus Biologicals                    | NB300-144      | 1:100    | No                         | Secondary fluorophore |
| Goat $\alpha$ -Itgb1      | R&D Systems                          | AF2405         | 1:13     | No                         | Secondary fluorophore |
| Rat $\alpha$ -Itgb4       | R&D Systems                          | MAB4054        | 1:20     | No                         | Secondary fluorophore |
| Chicken $\alpha$ -CK5     | BioLegend                            | Clone Poly9059 | 1:200    | No                         | Secondary fluorophore |
| Rabbit $\alpha$ -Rac1     | Proteintech                          | 24072-1-AP     | 1:200    | Yes                        | TSA                   |
| Rabbit $\alpha$ -pFAKY925 | Cell Signaling Technology            | 3284           | 1:100    | Yes                        | TSA                   |
| Rabbit $\alpha$ -pcJun    | Cell Signaling Technology            | 3270           | 1:40     | Yes                        | TSA                   |
| Rabbit $\alpha$ -PGP9.5   | Proteintech                          | 14730-1-AP     | 1:200    | Yes                        | Secondary fluorophore |
